1 **Evolutionary dynamics of sex chromosomes of palaeognathous birds**

2

3 Luohao Xu (1), Simon Yung Wa Sin (2,3,4), Phil Grayson (2,3), Daniel E. Janes<sup>†</sup> (3), Scott  
4 V. Edwards (2,3), Timothy B. Sackton\* (5)

5

6 (1) Department of Molecular Evolution and Development, University of Vienna, Austria

7 (2) Department of Organismic and Evolutionary Biology, Harvard University, USA

8 (3) Museum of Comparative Zoology, Harvard University, USA

9 (4) School of Biological Sciences, The University of Hong Kong, Pok Fu Lam Road, Hong  
10 Kong

11 (5) Informatics Group, Harvard University, USA

12

13 <sup>†</sup>Current address: National Institutes of Health, 9000 Rockville Pike, Bethesda, MD 20892,  
14 USA

15

16 \*correspondence to: [tsackton@g.harvard.edu](mailto:tsackton@g.harvard.edu)

17

18

19

## 20 **Abstract**

21 Standard models of sex chromosome evolution propose that recombination suppression leads to the  
22 degeneration of the heterogametic chromosome, as is seen for the Y chromosome in mammals and the  
23 W chromosome in most birds. Unlike other birds, palaeognaths (ratites and tinamous) possess large  
24 non-degenerate regions on their sex chromosomes (PARs or pseudoautosomal regions), despite  
25 sharing the same sex determination region as neognaths (all other birds). It remains unclear why the  
26 large PARs of palaeognaths are retained over more than 100 MY of evolution, and the impact of these  
27 large PARs on sex chromosome evolution. To address this puzzle, we analysed Z chromosome  
28 evolution and gene expression across 12 palaeognaths, several of whose genomes have recently been  
29 sequenced. We confirm at the genomic levels that most palaeognaths (excepting some species of  
30 tinamous) retain large PARs. As in neognaths, we find that all palaeognaths have incomplete dosage  
31 compensation on the regions of the Z chromosome homologous to degenerated portions of the W  
32 (differentiated regions or DRs), but we find no evidence for enrichments of male-biased genes in  
33 PARs. We find limited evidence for increased evolutionary rates (faster-Z) either across the  
34 chromosome or in DRs for most palaeognaths with large PARs, but do recover signals of faster-Z  
35 evolution similar to neognaths in tinamou species with mostly degenerated W chromosomes (small  
36 PARs). Unexpectedly, in some species PAR-linked genes evolve faster on average than genes on  
37 autosomes. Increased TE density and longer introns in PARs of most palaeognaths compared to  
38 autosomes suggest that the efficacy of selection may be reduced in palaeognath PARs, contributing to  
39 the faster-Z evolution we observe. Our analysis shows that palaeognath Z chromosomes are atypical  
40 at the genomic level, but the evolutionary forces maintaining largely homomorphic sex chromosomes  
41 in these species remain elusive.

42

## 43 **Introduction**

44 Sex chromosomes are thought to evolve from autosomes that acquire a sex  
45 determination locus (Bull 1983). Subsequent suppression of recombination between the X  
46 and Y (or the Z and W) chromosomes leads to the evolutionary degeneration of the sex-  
47 limited (Y or W) chromosome. Theoretical models predict that suppression of recombination  
48 will be favored so that the sexually antagonistic alleles that are beneficial in the  
49 heterogametic sex can be linked genetically to the sex determination locus (Rice 1987;  
50 Ellegren 2011). Recombination suppression is thought to be initiated by inversions, which  
51 can occur multiple times in the course of sex chromosome evolution (Lahn and Page 1999;  
52 Bergero and Charlesworth 2009; Cortez et al. 2014; Zhou et al. 2014; Wright et al. 2016).

53 Despite differences in their autosomal origins and heterogamety, eutherian mammals and  
54 neognathous birds followed similar but independent trajectories of sex chromosome evolution  
55 (Graves 2015; Bellott et al. 2017).

56 However, this model of sex chromosome evolution seems incompatible with patterns  
57 in many other vertebrate lineages. Henophidian snakes (boas) are thought to have ZW  
58 chromosomes that have remained homomorphic for about 100 MY (Vicoso, Emerson, et al.  
59 2013), although a recent study suggests a transition from ZW to XY system may have  
60 occurred (Gamble et al. 2017). Many lineages in fish and non-avian reptiles also possess  
61 homomorphic sex chromosomes, in most cases because the sex chromosomes appear to be  
62 young due to frequent sex chromosome turnover (Bachtrog et al. 2014). In some species of  
63 frogs, homomorphic sex chromosomes appear to be maintained by occasional XY  
64 recombination in sex-reversed XY females (the ‘fountain of youth’ model), which is possible  
65 if recombination suppression is a consequence of phenotypic sex rather than genotype (Perrin  
66 2009; Dufresnes et al. 2015; Rodrigues et al. 2018).

67 Palaeognathous birds (Palaeognathae), which include the paraphyletic and flightless  
68 ratites and the monophyletic tinamous, and comprise sister group to all other birds, also retain  
69 largely or partially homomorphic sex chromosomes (de Boer 1980; Ansari et al. 1988;  
70 Ogawa et al. 1998; Nishida-Umehara et al. 1999; Pigozzi and Solari 1999; Stiglec et al. 2007;  
71 Tsuda et al. 2007; Janes et al. 2009; Pigozzi 2011), albeit with some exceptions (Zhou et al.  
72 2014). These species share the same ancestral sex determination locus, *DMRT1*, with all other  
73 birds, suggesting its origin about 150 million years ago (Bergero and Charlesworth 2009;  
74 Yazdi and Ellegren 2014). Because recombination occurs in both males and females in birds,  
75 the ‘fountain of youth’ model is also not applicable in this case. Thus, the homomorphic sex  
76 chromosomes in palaeognaths must be old.

77 The reasons why palaeognath sex chromosomes have not degenerated are obscure,  
78 although two hypotheses have been proposed. Based on an excess of male-biased gene  
79 expression in the recombining pseudo-autosomal region, Vicoso and colleagues (Vicoso,  
80 Emerson, et al. 2013) suggested that sexual antagonism is resolved by sex-biased expression  
81 without recombination suppression and differentiation of Z and W sequences in emu.  
82 Alternatively, lack of dosage compensation, which in mammals and other species normalizes  
83 expression of genes on the hemizygous chromosome between the homogametic and  
84 heterogametic sex, has been proposed as a mechanism that could arrest the degeneration of

85 the W chromosome due to selection to maintain dosage-sensitive genes (Adolfsson and  
86 Ellegren 2013). Although these hypotheses are compelling, they have only been tested in  
87 single-species studies and without high quality genomes. A broader study of palaeognathous  
88 birds is therefore needed for comprehensive understanding of the unusual evolution of their  
89 sex chromosomes.

90 Degeneration of sex-limited chromosomes (the W or the Y) leads to the homologous  
91 chromosome (the Z or the X) becoming hemizygous in the heterogametic sex. Numerous  
92 studies have shown that one common consequence of this hemizyosity is that genes on the  
93 X or Z chromosome typically evolve faster on average than genes on the autosomes  
94 (Charlesworth et al. 1987; Meisel and Connallon 2013). The general pattern of faster-X or  
95 faster-Z protein evolution has been seen in many taxa, including *Drosophila* (Charlesworth et  
96 al. 1987; Baines et al. 2008; Avila et al. 2014; Charlesworth et al. 2018), birds (Mank et al.  
97 2007; Mank, Nam, et al. 2010), mammals (Torgerson 2003; Lu and Wu 2005; Kousathanas et  
98 al. 2014) and moths (Sackton et al. 2014). One primary explanation for this is that recessive  
99 beneficial mutations are immediately exposed to selection in the heterogametic sex, leading  
100 to more efficient positive selection (Charlesworth et al. 1987; Vicoso and Charlesworth 2006;  
101 Mank, Vicoso, et al. 2010). Alternatively, the degeneration of the Y or W chromosomes  
102 results in the reduction of the effective population size of the X or Z chromosomes relative to  
103 the autosomes (because there are 3 X/Z chromosomes for every 4 autosomes in a diploid  
104 population with equal sex ratios). This reduction in the effective population size can increase  
105 the rate of fixation of slightly deleterious mutations due to drift (Mank, Vicoso, et al. 2010;  
106 Mank, Nam, et al. 2010). In both scenarios, faster evolution of X- or Z-linked genes is  
107 expected.

108 The relative importance of these explanations varies across taxa. In both *Drosophila*  
109 and mammals, faster evolutionary rates of X-linked genes seem to be driven by more  
110 efficient positive selection for recessive beneficial alleles in males (Connallon 2007; Meisel  
111 and Connallon 2013). For female-heterogametic taxa, the evidence is mixed. In Lepidoptera  
112 there is evidence that faster-Z evolution is also driven by positive selection (Sackton et al.  
113 2014) or is absent entirely (Rousselle et al. 2016), whereas in birds, increased fixation of  
114 slightly deleterious mutations due to reduced  $N_e$  is likely a major factor driving faster-Z  
115 evolution (Mank, Nam, et al. 2010; Wang et al. 2014; Wright et al. 2015).

116 The limited degeneration of the W chromosome in palaeognaths makes these species

117 an ideal system to further test the causes of faster-Z evolution in birds. For many  
118 palaeognaths, a large proportion of the sex chromosomes retains homology and synteny  
119 between the Z and the W; these regions are referred to as pseudoautosomal regions (PARs)  
120 because they recombine in both sexes and are functionally not hemizygous in the  
121 heterogametic sex. In PARs, no effect of dominance is expected on evolutionary rates, and as  
122 the population size of the PAR is not different from that of autosomes, no increase in  
123 fixations of weakly deleterious mutations is expected. Therefore, neither the positive  
124 selection hypothesis nor the genetic drift hypothesis is expected to lead to differential  
125 evolutionary rates in the PAR compared to autosomes, although other selective forces such as  
126 sexually antagonistic selection may impact evolutionary rates in the PAR (Otto et al. 2011;  
127 Charlesworth et al. 2014).

128         With numerous new palaeognath genomes now available (Zhou et al. 2014; Le Duc et  
129 al. 2015; Zhang et al. 2015; Sackton et al. 2018), a reevaluation of sex chromosome evolution  
130 in palaeognaths is warranted. Here, we investigate faster-Z evolution, dosage compensation  
131 and sex-biased expression, to gain a better understanding of the slow evolution of sex  
132 chromosomes in ratites. Surprisingly, we did not find evidence for faster-Z evolution for most  
133 palaeognaths, even when analyzing only differentiated regions (DRs) that are functionally  
134 hemizygous in the heterogametic sex. Instead, we find limited evidence that PARs tend to  
135 evolve faster than autosomes. Indirect evidence from the accumulation of transposable  
136 elements and larger introns suggests reduced efficacy of selection in both PARs and DRs,  
137 potentially because of lower recombination rates compared to similarly sized autosomes.  
138 Based on new and previously published RNA-seq data, we find a strong dosage effect on  
139 gene expression, suggesting substantially incomplete dosage compensation as in other birds  
140 (Itoh et al. 2010; Adolfsson and Ellegren 2013; Uebbing et al. 2013; Uebbing et al. 2015), but  
141 do not recover a previously-reported excess of male-biased expression in the PAR (Vicoso,  
142 Kaiser, et al. 2013). Our results suggest that simple models of sex chromosome evolution  
143 probably cannot explain evolutionary history of palaeognath sex chromosomes.

## 144 **Results**

### 145 **Most palaeognaths have large pseudoautosomal regions**

146         To identify Z-linked scaffolds from palaeognath genomes, we used nucmer (Kurtz et  
147 al. 2004) to first align the published ostrich Z chromosome (Zhang et al. 2015) to assembled

148 emu scaffolds (Sackton et al. 2018), and then aligned additional palaeognaths (Fig. 1) to emu.  
 149 We then ordered and oriented putatively Z-linked scaffolds in non-ostrich assemblies into  
 150 pseudo-chromosomes using the ostrich Z chromosome as a reference (Fig. S1). Visualization  
 151 of pseudo-chromosome alignments (Fig. S1) showed little evidence for inter-chromosomal  
 152 translocations, as expected based on the high degree of synteny across birds (Ellegren 2010);  
 153 an apparent 12Mb autosomal translocation onto the ostrich Z chromosome is a likely mis-  
 154 assembly (Fig. S2).

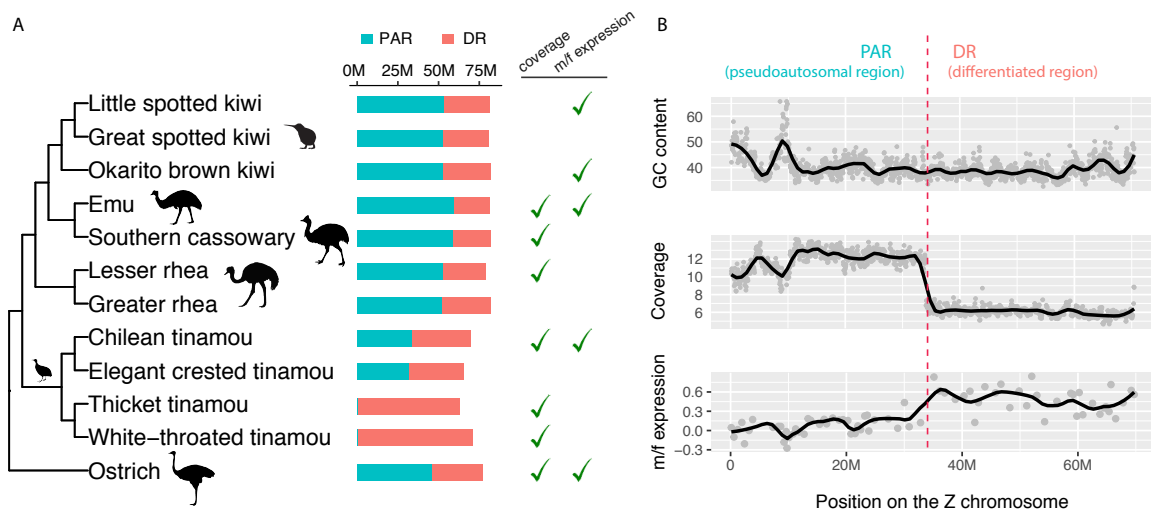

155

**FIG. 1.** Overview of PAR/DR annotation. **A**) The phylogeny of Palaeognathae based on (Sackton et al. 2018). The sizes of the PARs (pseudoautosomal regions) and DRs (differentiated regions) are indicated by the bars in cyan and tomato. The check marks indicate whether the PAR/DR boundaries were annotated by female read coverage and/or male-to-female expression ratios; species with no checks were annotated by homology to closest relatives. **B**) an example of PAR/DR annotation for Chilean tinamou. In the panels of GC content and coverage depth, each dot represents a 50k window. In the panel of m/f expression, each dot represents log<sub>2</sub> transformed mean m/f expression ratio of 10 consecutive genes.

156

157 We next annotated the pseudoautosomal region (PAR) and differentiated region (DR)  
 158 of the Z chromosome in each species. The DR is thought to arise as a result of inversions on  
 159 the Z or W chromosome that suppress recombination between the Z and the W, eventually  
 160 leading to degeneration of the W-linked sequence inside the inversion and hemizyosity of

161 the homologous Z-linked sequence (the DR). Outside the DR – in the PAR – ongoing  
162 recombination between the Z and the W chromosome maintains sequence homology. In the  
163 DR, reads arising from the W in females will not map to the homologous region of the Z (due  
164 to sequence divergence associated with W chromosome degeneration), while in the PAR  
165 reads from both the Z and the W will map to the Z chromosome. Thus, we expect coverage of  
166 sequencing reads mapped to the Z chromosome in the DR to be  $\frac{1}{2}$  that of the autosomes or  
167 PAR in females, logically similar to the approach used to annotate Y and W chromosomes in  
168 other species (Chen et al. 2012; Carvalho and Clark 2013; Tomaszekiewicz et al. 2017). We  
169 also annotated PAR/DR boundaries using gene expression data. If we assume that complete  
170 dosage compensation is absent, as it is in all other birds studied to date (Graves 2014), M/F  
171 expression ratios of genes on the Z with degenerated W-linked gametologs (in the DR)  
172 should be about twice that of genes with intact W-linked gametologs (in the PAR).

173 For seven species genomic sequencing data from females, either newly generated in  
174 this study (lesser rhea, thicket tinamou, Chilean tinamou) or previously published (emu,  
175 ostrich, cassowary, North Island brown kiwi, white-throated tinamou), we annotated PAR  
176 and DR regions using coverage (Fig. 1B, Fig. S3). While some variation in coverage  
177 attributable to differences in GC content is apparent, the coverage reduction in the DR region  
178 is robust (Fig. 1B). For three of these species, we also used newly generated (emu) or  
179 published (ostrich, Chilean tinamou) male and female RNA-seq data; using expression ratios  
180 to annotate DR/PAR boundaries produced results consistent with coverage analysis in all  
181 three of these species (Fig. 1B, Fig. S3, Fig. S4). We used expression ratios alone to  
182 demarcate the DR/PAR boundaries in little spotted kiwi and Okarito kiwi (Fig. S4), which we  
183 found to be in similar genomic locations in both species, and also in the same locations as the  
184 DR/PAR boundary position in North Island brown kiwi. For three species (greater rhea,  
185 elegant crested tinamou and great spotted kiwi) with neither female sequencing data nor  
186 expression data, we projected the DR/PAR boundary from a closely related species (lesser  
187 rhea, Chilean tinamou and little spotted kiwi respectively). Our results corroborate prior  
188 cytogenetic studies across palaeognaths and support a large PAR in all species except the  
189 Tinaminae (thicket tinamou and white-throated tinamou), which have small PARs and  
190 heteromorphic sex chromosomes. PAR sizes in non-Tinaminae palaeognaths range from 32.2  
191 Mb (49% of Z chromosome, in elegant crested tinamou) to 59.3 Mb (73% of Z chromosome,  
192 in emu); in contrast, PAR sizes in the Tinaminae and in typical neognaths rarely exceed ~1  
193 Mb (~1.3% of Z chromosome size) (Table S1).

194 **Genes with male-biased expression are not overrepresented in palaeognath PARs**

195           Several possible explanations for the maintenance of old, homomorphic sex  
196 chromosomes are related to gene dosage (Adolfsson and Ellegren 2013; Vicoso, Kaiser, et al.  
197 2013). We analyzed RNA-seq data from males and females from five palaeognath species,  
198 including newly collected RNA-seq data from three tissues from emu (brain, gonad, and  
199 spleen; 3 biological replicates from each of males and females), as well as previously  
200 published RNA-seq data from Chilean tinamou (Sackton et al. 2018), ostrich (Adolfsson and  
201 Ellegren 2013), kiwi (Ramstad et al. 2016), and additional embryonic emu samples (Vicoso,  
202 Kaiser, et al. 2013). For each species we calculated expression levels for each gene with  
203 RSEM (Li and Dewey 2011) and DESeq2 (Love et al. 2014), and computed male/female  
204 ratios to assess the extent of dosage compensation, although we note that this measure does  
205 not always reflect retention of ancestral sex chromosome expression levels in the hemizygous  
206 sex (Gu and Walters 2017). Consistent with previous studies in birds (Graves 2014), we find  
207 no evidence for complete dosage compensation by this measure. Instead, we see evidence for  
208 partial compensation with M/F ratios ranging from 1.19 to 1.68 (Fig. 2A). The extent of  
209 dosage compensation seems to vary among species, but not among tissues within species  
210 (Fig. S5).

211           Incomplete dosage compensation poses a challenge for detection of sex-biased genes:  
212 higher expression levels of DR-linked genes in males may be due to the incompleteness of  
213 dosage compensation rather than sex-biased expression *per se*. With substantially improved  
214 genome assemblies (and PAR/DR annotations) and data from a greater number of species, we  
215 reevaluated the observation that there is an excess of male-biased genes in the emu PAR.  
216 Previous work with a preliminary genome assembly (Vicoso, Kaiser, et al. 2013) showed  
217 evidence for an excess of male-biased genes in the emu PAR and argued that sexually  
218 antagonistic effects could be resolved via sex-biased expression instead of recombination  
219 suppression and W chromosome degeneration.

220



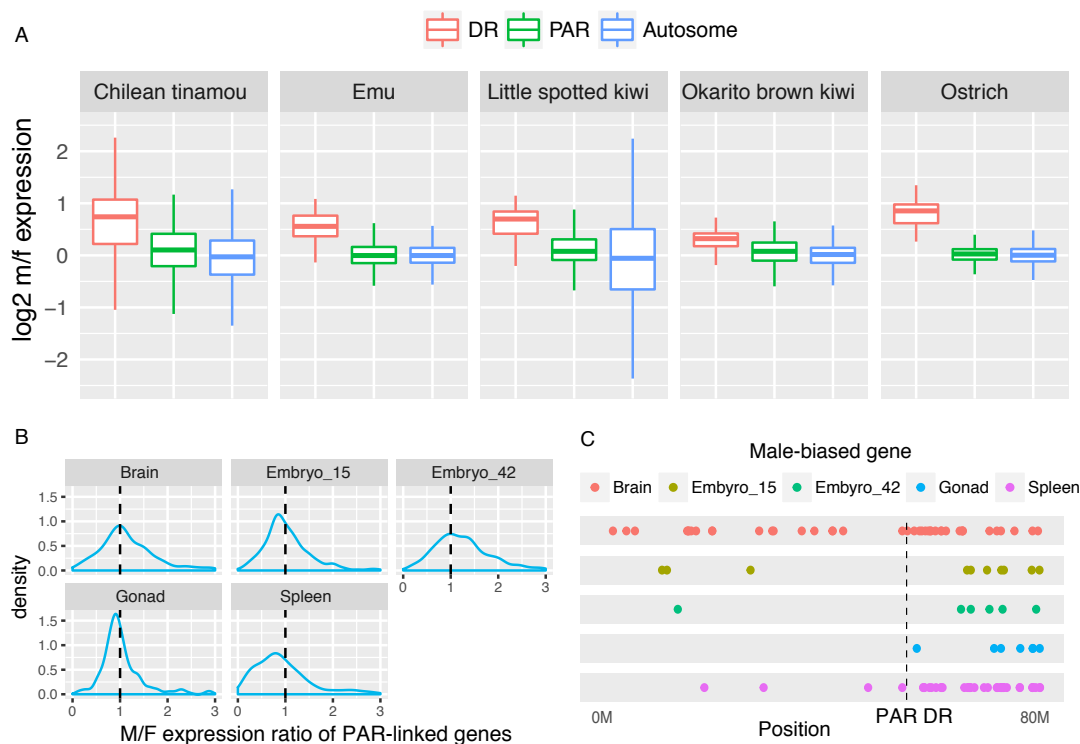

221

222 **FIG. 2.** Transcriptomic analyses for five palaeognathous species. **A)** Incomplete dosage  
 223 compensation in emu, kiwi and tinamou. For each species, only one sample is shown:  
 224 Chilean tinamou (brain), emu (gonad), ostrich (brain) and both kiwis have only blood  
 225 samples. Log<sub>2</sub> m/f expression ratios of DR-linked are larger than 0 but lower than 1. **B)** No  
 226 excess of male expression levels of PAR-linked genes in most emu tissues, despite slight  
 227 male-biased expression for 42-day embryo. **C)** No over-representation of male-biased genes  
 228 in emu PAR. Most Z-linked male-biased genes are located on the DR.

229

230 Using the PAR/DR annotation inferred in this study, we analyzed both the previously  
 231 published RNA-seq data from emu embryos and new RNA-seq data from three biological  
 232 replicates of three adult tissues from both sexes. We find that most emu Z-linked male-biased  
 233 genes are located on the DR (Fig. 2C), and when DR genes are excluded, we no longer detect  
 234 an excess of male-biased genes on the Z chromosome of emu (Fig. 2C). For PAR-linked  
 235 genes, although there was a slight shift of expression toward male-bias in 42-day emu  
 236 embryonic brain (Fig. 2B), only one gene was differentially expressed in male (Fig. 2C). This  
 237 lack of genes with male-biased expression in the PAR is largely consistent across other  
 238 palaeognaths with large PARs, including Chilean tinamou, ostrich and little spotted kiwi,

239 with one exception in the Okarito brown kiwi (Fig. S6). Overall, we see little evidence for  
240 accumulation of male-biased genes in palaeognath PARs, and suggest that the lack of  
241 degeneration of the emu W chromosome, and likely other palaeognathous chromosomes is  
242 probably not due to resolution of sexual antagonism through acquisition of sex-biased genes.

### 243 **Large PARs are associated with lack of faster-Z evolution in palaeognaths**

244 The unusually large PARs and the variation in PAR size make Palaeognathae a  
245 unique model to study faster-Z evolution. To test whether Z-linked genes evolve faster than  
246 autosomal genes, we computed branch-specific dN/dS ratios (the ratio of nonsynonymous  
247 substitution rate to synonymous substitution rate) using the PAML free-ratio model for  
248 protein coding genes (Yang 2007), based on previously published alignments (Sackton et al.  
249 2018). Because macro-chromosomes and micro-chromosomes differ extensively in the rates  
250 of evolution in birds (Gossmann et al. 2014; Zhang et al. 2014) (Fig. S7), we include only the  
251 macro-chromosomes (chr1 to chr10) in our comparison, and further focus on only  
252 chromosome 4 (97 Mb in chicken) and chromosome 5 (63 Mb) to match the size of the Z  
253 chromosome, unless otherwise stated.

254 We included include 23 neognaths and 12 palaeognaths in our analysis. Overall, Z-  
255 linked genes in neognaths (with few exceptions) have a significantly higher dN/dS ratio than  
256 autosomal (chr 4/5) genes, suggesting faster-Z evolution (Fig. 3). This result is consistent  
257 with a previous study involving 46 neognaths (Wang et al. 2014). In contrast to neognaths,  
258 the majority of palaeognaths, and all but two species with large PARs, had similar dN/dS  
259 ratios for autosomal and Z-linked genes, and thus did not show evidence for faster-Z  
260 evolution (Fig. 3).

261 The lack of a faster-Z effect for palaeognaths with large PARs is perhaps not surprising, since  
262 PAR-linked genes are not expected to evolve faster than autosomal genes under standard  
263 models of faster-Z evolution. We divided Z-linked genes into those with presumed intact W-  
264 linked gametologs (PAR genes) and those with degenerated W-linked gametologs (DR  
265 genes). Surprisingly, we see little evidence for faster-Z evolution in palaeognaths even for  
266 DR genes: only in cassowary, thick-killed tinamou and white-throated tinamou do DR genes show  
267 accelerated dN/dS and dN relative to autosomes (Fig. 4, Fig. S8). Thick-killed tinamou and white-  
268 throated tinamou possess small PARs typical of neognaths, and faster-Z has also been

269 observed for white-throated tinamou in a previous study (Wang et al. 2014), so faster-DR in  
 270 these species is expected.

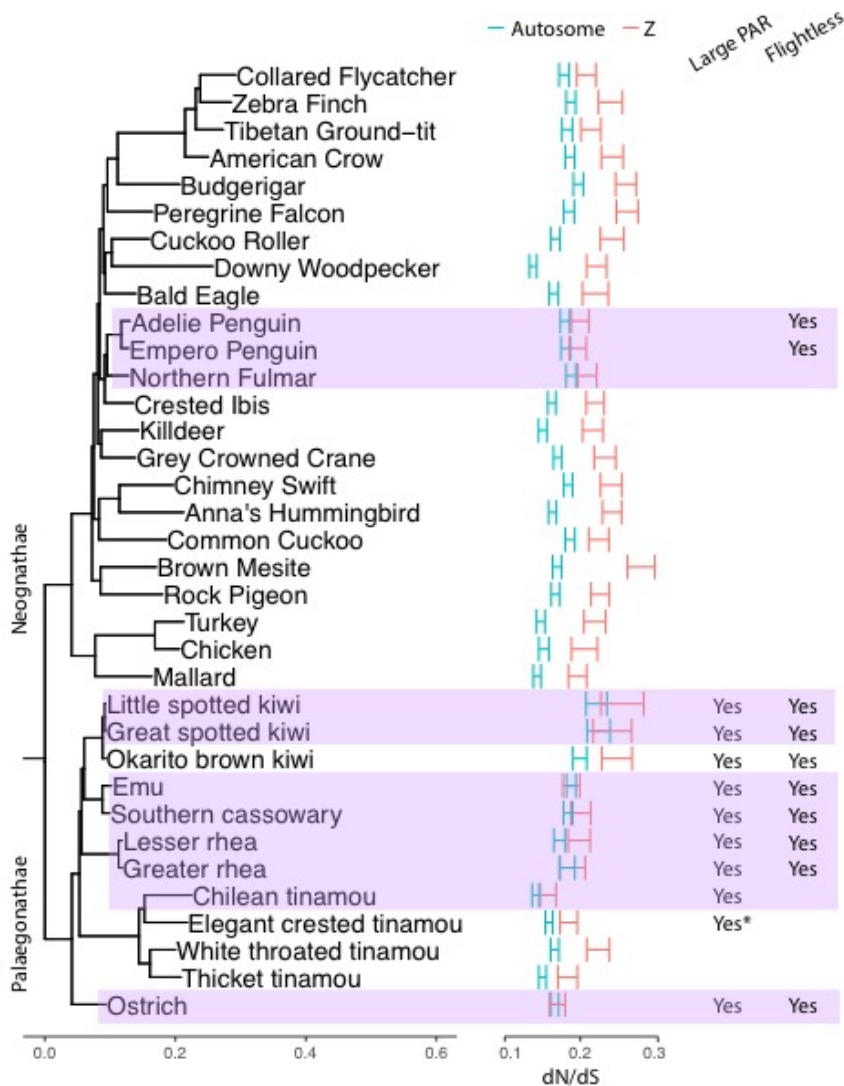

271

FIG. 3. A lack of faster-Z evolution in most Palaeognaths. Autosomes were represented by chromosome 4 and chromosome 5 (chr4/5) which have similar sizes compared to the Z chromosomes. The confidence intervals of dN/dS ratios were determined by 1,000 bootstraps. Species without faster-Z effect (permutation test,  $P > 0.05$ ) are highlighted in purple. The asterisk after 'Yes' or 'No' indicates uncertainty.

272

273 The observation of faster-DR evolution in cassowary ( $p = 0.009$ , two-sided  
 274 permutation test) suggests that faster-DR evolution may not be limited to species with

275 extensive degeneration of the W chromosome (e.g., with small PARs). However, an  
 276 important caveat is that the cassowary genome (alone among the large-PAR species) was  
 277 derived from a female individual, which means that some W-linked sequence could have  
 278 been assembled with the Z chromosome, especially for the region with recent degeneration.  
 279 This would cause an artefactual increase in divergence rate.

280 Unexpectedly, in four species of palaeognaths we find evidence that genes in the PAR  
 281 evolve faster than autosomal genes on chromosomes of similar size (chr4/5), which is not  
 282 predicted by either the positive selection or genetic drift hypothesis for faster-Z evolution  
 283 (Fig. 4). The faster-PAR effect shows a lineage-specific pattern, particularly in tinamous  
 284 where three of four species (white-throated tinamou, Chilean tinamou, elegant-crested  
 285 tinamou) show faster evolution for PAR-linked genes, and all four species have higher dN in  
 286 the PAR than autosomes, although not significantly so for the elegant-crested tinamou. The  
 287 faster-PAR in white-throated tinamou is particularly unexpected because previous studies

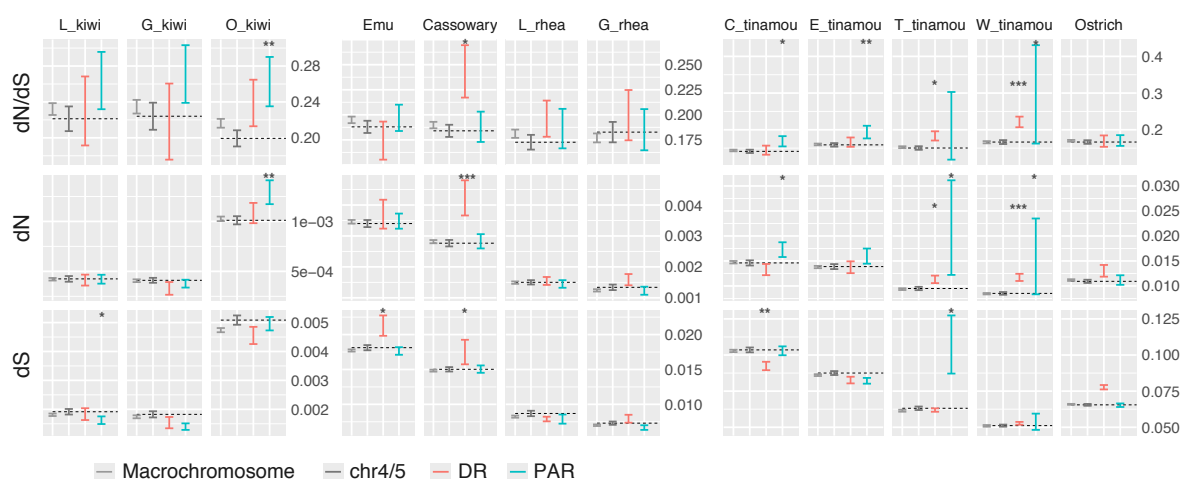

289 **FIG. 4.** Relative evolutionary rates of Z-linked and autosomal (chr4/5) genes. Confidence  
 290 intervals were estimated by 1,000 bootstraps. The label chr4/5 stands for chromosome 4 +  
 291 chromosome 5, and the median value for chr4/5 is also shown as a dotted line. Asterisks  
 292 indicate the significant levels of PAR/DR vs. chr4/5 comparison (two-sided permutation test),  
 293 \* <0.05, \*\* <0.01, \*\*\* <0.001. Abbreviation for species names: L\_kiwi, little spotted kiwi;  
 294 G\_kiwi, great spotted kiwi; O\_kiwi, Okarito brown kiwi; L\_rhea, Lesser rhea; G\_rhea,  
 295 Greater rhea; C\_tinamou, Chilean tinamou; E\_tinamou, elegant crested tinamou; T\_tinamou,  
 296 thicket tinamou; W\_tinamou, white-throated tinamou.

297

298 suggest that small PARs evolve slower in birds (Smeds et al. 2014). The small number of  
299 PAR-linked genes in white-throated tinamou (N=9) suggests some caution in interpreting this  
300 trend is warranted. The kiwis also show a trend towards faster-PAR evolution, though this is  
301 only statistically significant in Okarito brown kiwi ( $p = 0.010$ , two-sided permutation test)  
302 (Fig. 4). Interestingly, species with evidence for faster-PAR evolution also have suggestive  
303 evidence of relatively faster rates of W chromosome degeneration. In particular, tinamous  
304 have intermediate or small PARs (Fig. 1), suggesting that sex chromosomes may not be as  
305 stable in these species as in ratites. Similarly, while PARs in the little spotted kiwi and great  
306 spotted kiwi are large compared to neognaths, they are relatively shorter than in ostrich, emu  
307 and cassowary, suggesting additional degeneration of the W chromosomes. Moreover, in  
308 North Island brown kiwi, coverage for female reads suggests an on-going degeneration of the  
309 W chromosome (Fig. S3). However, further study will be needed to confirm this trend.

310

### 311 **Evidence for reduced efficacy of selection on the Z chromosome**

312 The signatures of higher dN and dN/dS we observe in the PARs of tinamous and  
313 some other species could be driven by increased fixation of weakly deleterious mutations, if  
314 the efficacy of selection is reduced in PARs despite homology with the non-degenerated  
315 portion of the W chromosome. One potential marker of the efficacy of selection is the density  
316 of transposable elements (TEs), which are thought to increase in frequency when the efficacy  
317 of selection is reduced (Rizzon et al. 2002; Lockton et al. 2008). We find that chromosome  
318 size, which is correlated with recombination rates in birds (Kawakami et al. 2014), shows a  
319 strong positive correlation with TE density (lowest in Okarito brown kiwi,  $r = 0.90$ ; highest in  
320 white-throated tinamou,  $r = 0.98$ ) (Fig. S9, Table S2). Extrapolating from autosomal data, we  
321 would expect PARs (smaller than 50Mb in all species) to have lower TE density than chr5  
322 (~63Mb) or chr4 (~89Mb) if similar evolutionary forces are acting on them to purge TEs.  
323 Strikingly, we find that all palaeognaths with large PARs harbor significantly higher TE  
324 densities on the PAR than autosomes (Fig. 4B), which suggests reduced purging of TEs on  
325 PARs. For DRs, it is unsurprising that TE densities are much higher than in chr4/5 (Fig. 4B)  
326 since both reduced recombination rates (due to no recombination in females) and reduced  $N_e$   
327 (due to hemizyosity of the DR in females) will reduce the efficacy of selection. In fact, TE

328 densities of the DRs are also higher than those of all macro-chromosomes, as well as those of  
 329 the PARs (Fig. 4B).

330 Intron size is probably also under selective constraint (Carvalho and Clark 1999), and  
 331 in birds smaller introns are likely favored (Zhang and Edwards 2012; Zhang et al. 2014). If  
 332 this is also the case in palaeognaths, an expansion of intron sizes could suggest reduced  
 333 efficacy of selection. We compared the intron sizes among PARs, DRs and autosomes across  
 334 all palaeognaths in our study. Like TE densities, intron sizes show strong positive correlation  
 335 with chromosome size (lowest in Okarito brown kiwi,  $r = 0.74$ ; highest in thick-tailed tinamou,  $r =$   
 336  $0.91$ ) (Fig. S9, Table S2). Except for white-throated tinamou and thick-tailed tinamou, intron sizes  
 337 of the PARs are larger than those of chr4/5 ( $p < 8.8e-10$ , Wilcoxon rank sum test, fig. 4C).

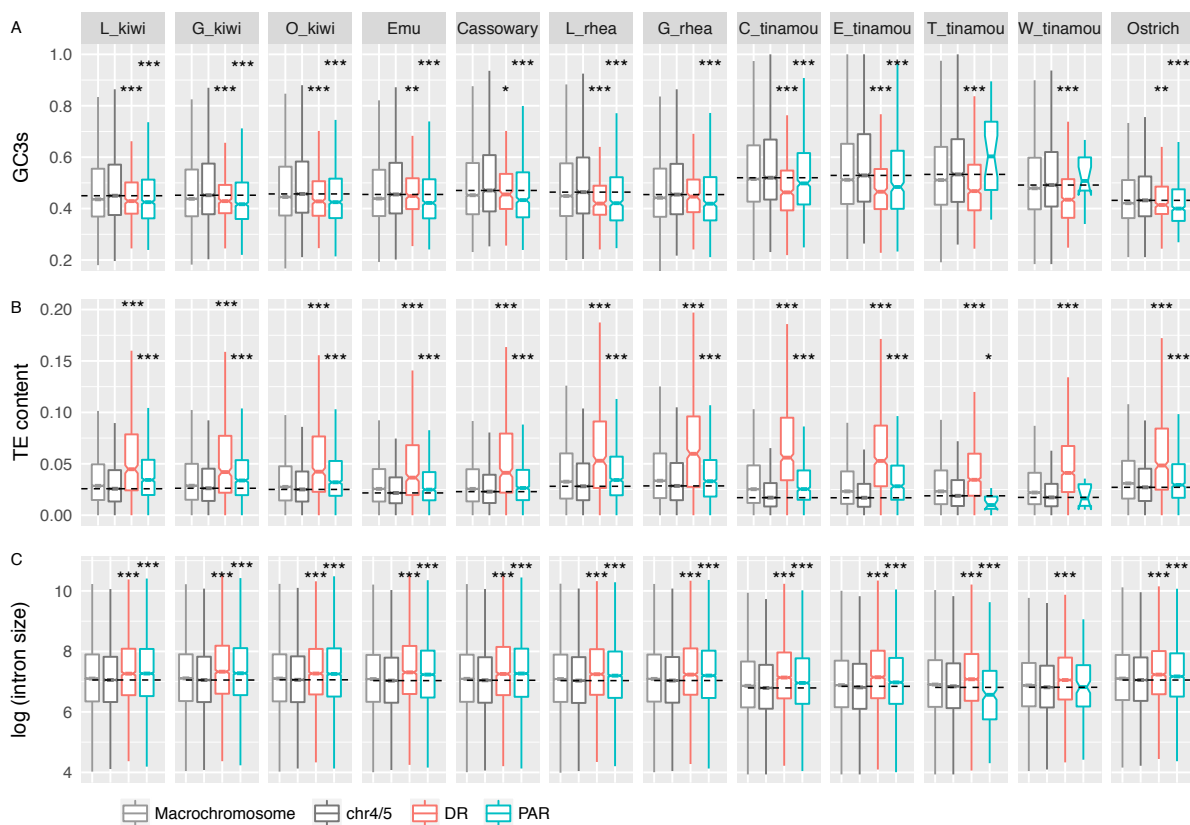

338

339 **FIG. 5.** The comparison of PAR/DR vs. chr4/5 and macrochromosomes of four genomic  
 340 features. Median values from chr4/5 are shown as a dotted horizontal line. Asterisks indicate  
 341 the significant levels of PAR/DR vs. chr4/5 comparison (Wilcoxon sum rank test), \* <math>< 0.05</math>,  
 342 \*\* <math>< 0.01</math>, \*\*\* <math>< 0.001</math> **A)** GC content of the synonymous sites. **B)** TE content, including  
 343 SINE, LINE, LTR and DNA element. **C)** Log transformed intron size.

344 The pattern of larger intron sizes in the PARs remains unchanged when all macro-  
345 chromosomes were included for comparison (Fig. S9). Similar to PARs, DRs also show  
346 larger intron sizes relative to chr4/5 ( $p < 0.00081$ , Wilcoxon rank sum test).

347 Finally, codon usage bias is often used as proxy for the efficacy of selection and is  
348 predicted to be larger when selection is more efficient (Shields et al. 1988). To assess codon  
349 usage bias, we estimated effective number of codon (ENC) values, accounting for local  
350 nucleotide composition. ENC is lower when codon bias is stronger, and thus should increase  
351 with reduced efficacy of selection. As expected, ENC values showed a strong positive  
352 correlation with chromosome sizes (Table S2), and are higher for DR-linked genes in most  
353 species (although not rheas, the little spotted kiwi, or the Okarito brown kiwi) (Fig. S10).  
354 However, for PAR-linked genes, ENC does not suggest widespread reductions in the efficacy  
355 of selection: only cassowary and Chilean tinamou exhibited significantly higher ENC values  
356 in the PAR, although a trend of higher ENC values can be seen for most species (Fig. S10).

357 One possible cause of changes in the efficacy of selection in the absence of W  
358 chromosome degeneration is a reduction in the recombination rate of the PAR of some  
359 species with a large PAR, although a previous study on the collared flycatcher (a neognath  
360 species with a very small PAR) showed that the PAR has a high recombination rate (Smeds et  
361 al. 2014). Previous work (Bolivar et al. 2016) has shown that recombination rate is strongly  
362 positively correlated with GC content of synonymous third positions in codons (GC3s) in  
363 birds, so we used GC3s as a proxy for recombination rate in the absent of pedigree or  
364 population samples to estimate the rate directly. We find that GC3s are strongly negatively  
365 correlated with chromosome size in all palaeognaths ( $-0.78 \sim -0.91$ ,  $p\text{-value} \leq 0.0068$ )  
366 except for ostrich ( $r=-0.51$ ,  $p=0.11$ ) (Fig. S9, Fig. S11, Table S2), similar to what was  
367 observed in mammals (Romiguier et al. 2010). Recombination rates are also negatively  
368 correlated with chromosome sizes in birds (Gossmann et al. 2014; Kawakami et al. 2014) and  
369 other organisms (Jensen-Seaman et al. 2004)(Jensen-Seaman et al. 2004)(Jensen-Seaman et  
370 al. 2004)(Jensen-Seaman et al. 2004)(Jensen-Seaman et al. 2004), suggesting that GC3s are at  
371 least a plausible proxy for recombination rate. In contrast to the results for collared  
372 flycatcher, GC3s of palaeognath PARs were significantly lower than those of chr4/5s ( $p <$   
373  $2.23e-05$ , Wilcoxon sum rank test) (Fig. 5A, Fig. S9, Fig. S11), except for white-throated  
374 tinamou and thicket tinamou. Inclusion of the other macro-chromosome does not change the

375 pattern ( $p < 0.0034$ ). Moreover, distribution of GC3s along the PAR is more homogeneous  
376 compared to chr4 or chr5, except for the chromosomal ends (Fig. S11).

377 Overall, then, we find evidence from TE density and intron size that efficacy of  
378 selection may be reduced on the PAR in most large-PAR palaeognaths, potentially because of  
379 reductions in recombination rate (as suggested by reduced GC3s), although we note the  
380 signature from codon bias (ENC) is more ambiguous. If indeed recombination rate is reduced  
381 relative to a similarly sized autosome for most large-PAR species, that could explain why we  
382 see some evidence for faster-PAR evolution in palaeognaths.

### 383 **Discussion**

384 Old, homomorphic sex chromosomes have long been an evolutionary puzzle, as they  
385 defy our usual expectations about how sexually antagonistic selection drives recombination  
386 suppression of the Y (or W) chromosome and eventual degradation. A long-standing example  
387 of old, homomorphic sex chromosomes are found in the Palaeognathae, where previous  
388 cytogenetic and genomic studies have clearly demonstrated the persistence of largely  
389 homomorphic sex chromosomes. Our results extend previous studies, and confirm at the  
390 genomic level that all ratites and some tinamous have large, nondegenerate PARs, while in at  
391 least some Tinaminae degradation of the W chromosome has proceeded, resulting in typically  
392 small PARs.

### 393 **Evolutionary forces acting on sex chromosomes**

394 Several studies have reported evidence for faster-Z evolution in birds, probably driven  
395 largely by increased fixation of weakly deleterious mutations due to reduced  $N_e$  of the Z  
396 chromosome (Mank, Nam, et al. 2010; Wright et al. 2015). However, these studies have  
397 focused on neognaths, with fully differentiated sex chromosomes. Here, we show that  
398 palaeognath sex chromosomes, which mostly maintain large PARs, do not have consistent  
399 evidence for faster-Z evolution, while confirming the pervasive faster-Z effect in neognaths.  
400 Notably, the two species in our dataset that presumably share heteromorphic sex  
401 chromosomes derived independently from neognaths (white-throated tinamou and thicket  
402 tinamou) do show evidence for faster-Z evolution, and in particular faster evolution of DR  
403 genes. In contrast, palaeognaths with small DR and large PAR do not tend to show evidence



404 for faster-DR, even though hemizyosity effects should be apparent (the exception is  
405 cassowary, which may be an artifact due to W-linked sequence assembling as part of the Z).

406 A previous study on neognaths shows that the increased divergence rate of the Z is  
407 mainly contributed by recent strata while the oldest stratum (S0) does not show faster-Z  
408 effect (Wang et al. 2014). Neognaths and palaeognaths share the S0, and since their  
409 divergence only a small secondary stratum has evolved in palaeognaths (Zhou et al. 2014). In  
410 particular, the DR of palaeognaths without heteromorphic sex chromosomes is largely  
411 dominated by this shared S0 stratum. The absence of faster-Z effect in palaeognath DR where  
412 S0 dominates is therefore largely consistent with the results of the study on the neognath S0  
413 stratum. A possible mechanism to explain this pattern is that, in S0, the reduced effective  
414 population size (increasing fixation of deleterious mutations) is balanced by the greater  
415 efficacy of selection in removing recessive mutations (due to hemizyosity). A recent study  
416 on ZW evolution in *Maniola jurtina* and *Pyronia tithonus* butterflies suggests a similar  
417 model, where purifying selection is acting on the hemizygous DR genes to remove  
418 deleterious mutations (Rousselle et al. 2016). While this model would account for the pattern  
419 we observe, it remains unclear why the shared S0 stratum should have a different balance of  
420 these forces than the rest of the DR in both neognaths and palaeognaths with large DRs.  
421 Nonetheless, the evolutionary rates of the DR genes in the older strata are probably the net  
422 results of genetic drift and purifying selection against deleterious mutation, with little  
423 contribution of positive selection for recessive beneficial mutations.

424 We also detect evidence for faster evolution of genes in the PAR for tinamous and  
425 some species of kiwi. Since the PAR is functionally homomorphic and recombines with the  
426 homologous region of the W chromosome, it is not clear why this effect should be observed  
427 in these species. However, a common feature of the PARs of tinamous and kiwis is that they  
428 are relatively shorter than PARs of other palaeognaths. This raises at least two possible  
429 explanations for the faster-PAR effect in tinamous and kiwis: 1) the differentiation of the sex  
430 chromosomes is more rapid compared with other palaeognaths, and at least some parts of the  
431 PARs may have recently stopped recombining and actually become DR but undetectable by  
432 using the coverage method; or 2) the PARs are still recombining but at lower rate, resulting in  
433 weaker efficacy of selection against deleterious mutations.

434 **Efficacy of selection and recombination rate**

435 Multiple lines of evidence suggest a possible reduction in the efficacy of selection in  
436 the PAR across all palaeognaths with a large PAR. Specifically, we find both an increase in  
437 TE density and an increase in intron size in PARs. In contrast, we do not find clear evidence  
438 for a reduction in the degree of codon bias in PARs. However, it is possible that genetic drift  
439 (Marais et al. 2001), GC-biased gene conversion (Galtier et al. 2018) and/or mutational bias  
440 (Szövényi et al. 2017) may also affect the codon bias, which may weaken the correlation  
441 between codon usage bias and the strength of natural selection.

442 It is unclear, however, why the efficacy of selection may be reduced in PARs. One  
443 possible cause is that the PARs may recombine at lower rate than autosomes. This is a  
444 somewhat unexpected prediction because in most species PARs have higher recombination  
445 rates than autosomes (Otto et al. 2011). In birds, direct estimates of recombination rates of the  
446 PARs are available in both collared flycatcher and zebra finch, and in both species PARs  
447 recombines at much higher rates than most macrochromosomes (Smeds et al. 2014; Singhal  
448 et al. 2015). This is probably due to the need for at least one obligate crossover in female  
449 meiosis, combined with the small size of the PAR in both collared flycatcher and zebra finch.

450 In palaeognaths where PARs are much larger, direct estimates of recombination rate  
451 from pedigree or genetic cross data are not available. Our observation that GC3s are  
452 significantly lower in large palaeognath PARs than similarly sized autosomes is at least  
453 consistent with reduced recombination rates in these species. However, a recent study on  
454 greater rhea shows that the recombination rate of the PAR does not differ from similarly  
455 sized autosomes in females (del Priore and Pigozzi 2017), but this study did not examine  
456 males. Since the recombination rates differ extensively between sexes (van Oers et al. 2014;  
457 Halldorsson et al. 2016; Bhérier et al. 2017), more data is needed to test whether sex-average  
458 recombination rate of the PAR differs from autosomes. Additionally, a previous study of emu  
459 conducted prior to the availability of an emu genome assembly suggested that the PAR has a  
460 higher population recombination rate than autosomes (Janes et al. 2009). However, of twenty  
461 two loci in that study, seven appear to be incorrectly assigned to the sex chromosomes based  
462 on alignment to the emu genome assembly (Table S3), potentially complicating that  
463 conclusion. The relatively small size of that study and recently improved resources and  
464 refined understanding of recombination rates across chromosome types provide opportunities  
465 for a new analysis. Further direct tests of recombination rate on ratite Z chromosomes are  
466 needed to resolve these discrepancies.

467

## 468 **Sexual antagonism and sex chromosome degeneration**

469           A major motivation for studying palaeognath sex chromosomes is that, unusually,  
470 many palaeognaths seem to maintain old, homomorphic sex chromosomes. Standard models  
471 of sex chromosome evolution, in which recombination suppression evolves in order to tightly  
472 link sexually antagonistic mutations to the sex determination locus, thus do not seem to be  
473 able to explain palaeognath sex chromosomes. Previous work has suggested two hypotheses  
474 to explain this discrepancy: (1) the lack of dosage compensation in birds prevents the  
475 degeneration of the W chromosome due to dosage sensitivity (Adolfsson and Ellegren 2013),  
476 or (2) sexually antagonistic effects are resolved by the evolution of male-biased expression  
477 (Vicoso, Kaiser, et al. 2013).

478           However, neither hypothesis seems to fully explain the slow degeneration of  
479 palaeognath sex chromosomes. Published RNA-seq expression data from both males and  
480 females from ostrich, Okarito brown kiwi, and little brown kiwi, as well as new RNA-seq  
481 data from emu and Chilean tinamou, suggest dosage compensation is partial in palaeognaths  
482 and consistent with what has been seen in neognaths. If the absence of complete dosage  
483 compensation is the reason for the arrested sex chromosome degeneration in palaeognaths, it  
484 is not clear why some palaeognaths (thicket tinamou and white-throated tinamou) and all  
485 neognaths have degenerated W chromosomes and small PARs. The other hypothesis, derived  
486 from a previous study on emu (Vicoso, Kaiser, et al. 2013), implies an excess of male-biased  
487 genes on the PAR as resolution of sexual antagonism. However, gene expression data from  
488 multiple tissues and stages of emu show that male-biased genes are only enriched on the DR  
489 (presumably attributable to incomplete dosage compensation), with very few present on the  
490 PAR. We find similar patterns in other species.

491           Classic views on the evolution of sex chromosomes argue that recombination  
492 suppression ultimately leads to the complete degeneration of the sex-limited chromosomes  
493 (Charlesworth et al. 2005; Bachtrog 2006). However, recent theoretical work suggests  
494 suppression of recombination is not always favored, and may require strong sexually  
495 antagonistic selection (Charlesworth et al. 2014) or other conditions (Otto 2014). Thus, there  
496 may be conditions which would have driven tight linkage of the sex-determining locus and  
497 sex-specific beneficial loci via the suppression of recombination in neognaths (Gorelick et al.

498 2016; Charlesworth 2017), but not in palaeognaths, although it remains unclear the exact  
499 model that could produce this pattern (it would require, e.g. fewer sexually antagonistic  
500 mutations in palaeognaths).

501           Alternatively, the suppression of recombination between sex chromosomes may be  
502 unrelated to sexually antagonistic selection (Rodrigues et al. 2018), and non-adaptive. By  
503 model simulations, Cavoto and colleagues (Cavoto et al. 2017) recently suggests complete  
504 recombination suppression can sometimes be harmful to the heterogametic sex, and sex  
505 chromosomes are not favorable locations for sexually antagonistic alleles in many lineages.  
506 An alternative evolutionary explanation for loss of recombination in the heterogametic sex is  
507 then needed. Perhaps the rapid evolution of the sex-limited chromosome may have its role in  
508 the expansion of the non-recombining region on the sex chromosome. For instance, once  
509 recombination ceases around the sex-determination locus, the W (and Y) chromosome  
510 rapidly accumulates TEs, particularly LTRs, and the spread of LTRs in the non-recombining  
511 region may in turn increase the chance of LTR-mediated chromosomal rearrangements,  
512 including inversions, leading to the suppression of recombination between the W and Z (or Y  
513 and X). Future study on the W chromosomes of palaeognaths and neognaths is needed to  
514 elucidate the role the W in the evolution of avian sex chromosomes.

## 515 **Methods**

### 516 **Identification of the Z chromosome, PARs and DRs**

517 The repeat-masked sequence of ostrich Z chromosome (chrZ) (Zhang et al. 2015) was  
518 used as a reference to identify the homologous Z-linked scaffolds in recently assembled  
519 palaeognath genomes (Sackton et al. 2018). We used nucmer function from MUMmer  
520 package (Kurtz et al. 2004) to first align the ostrich Z-linked scaffolds to emu genome; an  
521 emu scaffold was defined as Z-linked if more than 50% of the sequence was aligned. The Z-  
522 linked scaffolds of emu were further used as reference to infer the homologous Z-linked  
523 sequences in the other palaeognaths because of the more continuous assembly of emu  
524 genome and closer phylogenetic relationships, and 60% coverage of alignment was required.  
525 During this process, we found that a ~12Mb genomic region of ostrich chrZ (scf347, scf179,  
526 scf289, scf79, scf816 and a part of scf9) aligned to chicken autosomes. The two breakpoints  
527 can be aligned to a single scaffold of lesser rhea (scaffold\_0) (Fig. S1), so we checked  
528 whether there could be a mis-assembly in ostrich by mapping the 10k and 20k mate-pair  
529 reads from ostrich to the ostrich assembly. We inspected the reads alignments around the  
530 breakpoint and confirmed a likely mis-assembly (Fig. S2). The homologous sequences of this  
531 region were subsequently removed from palaeognathous Z-linked sequences. When a smaller  
532 ostrich scaffold showed discordant orientation and/or order, but its entire sequence was  
533 harbored within the length of longer scaffolds of other palaeognaths (Fig. S1), we manually  
534 changed the orientation and/or order of that scaffold for consistency. After correcting the  
535 orientations and orders of ostrich scaffolds of chrZ, a second round of nucmer alignment was  
536 performed to determine the chromosomal positions for palaeognathous Z-linked scaffolds.

537 One way to infer the boundary between the PAR (pseudoautosomal region) and DR  
538 (differentiated region) is to compare the differences of sequencing depth of female DNA.  
539 Because the DR is not recombining in female and W-linked DR will degenerate over time  
540 (and thus diverge from Z-linked DR), the depth of sequencing reads from the Z-linked DR is  
541 generally expected to be half of that from the PAR or autosomes. This approach was applied  
542 to cassowary, whose sequence is derived a female individual. For emu, female sequencing  
543 was available from Vicoso et al. (Vicoso, Kaiser, et al. 2013). To facilitate the PAR  
544 annotation, we generated additional DNA-seq data from a female for each of lesser rhea,  
545 Chilean tinamou and thick-killed tinamou. Default parameters of BWA (v0.7.9) were used to map  
546 DNA reads to the repeat-masked genomes with BWA-MEM algorithm (Li 2013), and

547 mapping depth was calculated by SAMtools (v1.2) (Li et al. 2009). A fixed sliding window  
548 of 50kb was set to calculate average mapping depths along the scaffolds. Any windows  
549 containing less than 5kb were removed. Significant shifts of sequencing depth were annotated  
550 as the boundaries of the PARs and DRs.

551 Another independent method for PAR annotation is based on gene expression  
552 differences between male and female of PAR- and DR-linked genes. To reduce the effect of  
553 transcriptional noise and sex-biased expression, 20-gene windows were used to calculate the  
554 mean male-to-female ratios. The shifts of male-to-female expression ratios were used to  
555 annotate approximate PAR/DR boundaries. This method was applied to little spotted kiwi,  
556 Okarito brown kiwi, emu and Chilean tinamou. Given the small divergence between little  
557 spotted kiwi and great spotted kiwi, it is reasonable to infer that the latter should have a  
558 similar PAR size. Neither female reads nor RNA-seq reads are available for greater rheas and  
559 elegant crested tinamou, so the PAR/DR boundaries of lesser rhea and Chilean tinamou were  
560 used to estimate the boundaries respectively.

## 561 **Comparison of genomic features**

562 To estimate GC content of synonymous sites of the third position of codons (GC3s),  
563 codonW (<http://codonw.sourceforge.net>) was used with the option '-gc3s'. The exon density  
564 was calculated by dividing the total length of exon over a fixed 50k windows by the window  
565 size. Similarly, we summed the lengths of transposable elements (TEs, including LINE,  
566 SINE, LTR and DNA element) based on RepeatMasker outputs (Kapusta *et al*, personal  
567 communication) to calculate density for 50k windows. Intron sizes were calculated from gene  
568 annotations (GFF file). Codon usage bias were quantified by effective number of codons  
569 (ENC) using ENCprime. We used intronic sequences to estimate background nucleotide  
570 frequency to further reduce the effect of local GC content on codon usage estimates.  
571 Wilcoxon sum rank test were used to assess statistical significance.

## 572 **Divergence analyses**

573 The estimates of synonymous and non-synonymous substitution numbers and sites  
574 were extracted from PAML (Yang 2007) outputs generated by free-ratio branch models,  
575 based on alignments produced by Sackton et al (Sackton et al. 2018). For a given  
576 chromosome, the overall synonymous substitution rate (dS) was calculated as the ratio of the

577 number of synonymous substitution to the number of synonymous site over the entire  
578 chromosome, similarly, the chromosome-wide dN was calculated using the numbers of non-  
579 synonymous substitution and site over the entire chromosome (this is effectively a length-  
580 weighted average of individual gene values). The dN/dS values ( $\omega$ ) were calculated by the  
581 ratios of dN to dS values. Confidence intervals for dN, dS and dN/dS were estimated using  
582 the R package 'boot' with 1000 replicates of bootstrapping. P-values were calculated by  
583 taking 1000 permutation tests.

#### 584 **Gene expression analyses**

585 Three biological replicates of samples from emu brains, gonads and spleens of both  
586 adult sexes were collected from Songline Emu farm (specimen numbers: Museum of  
587 Comparative Zoology, Harvard University Cryo 6597-6608). For Chilean tinamou, RNA  
588 samples were collected from brains and gonads of both sexes of adults with one biological  
589 replicate (raw data from (Sackton et al. 2018), but re-analyzed here). RNA-seq reads for both  
590 sexes of ostrich brain and liver (Adolfsson and Ellegren 2013), emu embryonic brains of two  
591 stages (Vicoso, Kaiser, et al. 2013), and blood of little spotted kiwi and Okarito brown kiwi  
592 (Ramstad et al. 2016) were downloaded from NCBI.

593 For the newly generated samples (emu brains, gonads and spleens), RNA extraction  
594 was performed using RNeasy Plus Mini kit (Qiagen). The quality of the total RNA was  
595 assessed using the RNA Nano kit (Agilent). Poly-A selection was conducted on the total  
596 RNA using PrepX PolyA mRNA Isolation Kit (Takara). The mRNA was assessed using the  
597 RNA Pico kit (Agilent) and used to make transcriptome libraries using the PrepX RNA-Seq  
598 for Illumina Library Kit (Takara). HS DNA kit (Agilent) was used to assess the library  
599 quality. The libraries were quantified by performing qPCR (KAPA library quantification kit)  
600 and then sequenced on an NextSeq instrument (High Output 150 kit, PE 75 bp reads). Each  
601 library was sequenced to a depth of approximately 30M reads. The quality of the RNA-seq  
602 data was assessed using FastQC. Error correction was performed using Rcorrector; unfixable  
603 reads were removed. Adapters were removed using TrimGalore!. Reads of rRNAs were  
604 removed by mapping to the Silva rRNA database.

605 We used RSEM (v1.2.22) (Li and Dewey 2011) to quantify the gene expression  
606 levels. RSEM implemented bowtie2 (v2.2.6) to map the RNA-seq raw reads to transcripts  
607 (based on a GTF file for each species), and default parameters were used for expression

608 quantification. TPM (Transcripts Per Million) on the gene level were used to represent the  
609 normalized expression. The expected reads counts rounded from RSEM outputs were used as  
610 inputs for DESeq2 (Love et al. 2014) for differential expression analysis between sexes. We  
611 used a 5% FDR cutoff to considered as sex-biased genes.

612

### 613 **Acknowledgements**

614 We thank John Parsch, Beatriz Vicoso, and Qi Zhou for their useful comments. The  
615 computations in this paper were performed on the Odyssey cluster at Harvard University and  
616 supported by Harvard University Research Computing. This work was supported by NSF  
617 grant DEB-135343/EAR-1355292 to SVE. All raw data newly generated in this study (emu  
618 RNA-seq, and DNA-seq from lesser rhea, Chilean tinamou, and thicket tinamou) are  
619 available from NCBI at BioProjects XXXXXX and XXXXXX.

### 620 **References:**

- 621 Adolfsson S, Ellegren H. 2013. Lack of dosage compensation accompanies the arrested stage  
622 of sex chromosome evolution in ostriches. *Mol. Biol. Evol.* 30:806–810.
- 623 Ansari HA, Takagi N, Sasaki M. 1988. Morphological differentiation of sex chromosomes in  
624 three species of ratite birds. *Cytogenet. Genome Res.* 47:185–188.
- 625 Avila V, Marion de Procé S, Campos JL, Borthwick H, Charlesworth B, Betancourt AJ.  
626 2014. Faster-X effects in two *Drosophila* lineages. *Genome Biol. Evol.* 6:2968–2982.
- 627 Bachtrog D. 2006. A dynamic view of sex chromosome evolution. *Curr. Opin. Genet. Dev.*  
628 16:578–585.
- 629 Bachtrog D, Mank JE, Peichel CL, Kirkpatrick M, Otto SP, Ashman T-L, Hahn MW, Kitano  
630 J, Mayrose I, Ming R, et al. 2014. Sex determination: why so many ways of doing it? *PLoS*  
631 *Biol.* 12:e1001899.
- 632 Baines JF, Sawyer SA, Hartl DL, Parsch J. 2008. Effects of X-Linkage and Sex-Biased Gene  
633 Expression on the Rate of Adaptive Protein Evolution in *Drosophila*. *Mol. Biol. Evol.*  
634 25:1639–1650.
- 635 Bergero R, Charlesworth D. 2009. The evolution of restricted recombination in sex  
636 chromosomes. *Trends Ecol. Evol.* 24:94–102.
- 637 Bhérier C, Campbell CL, Auton A. 2017. Refined genetic maps reveal sexual dimorphism in



- 638 human meiotic recombination at multiple scales. *Nat. Commun.* 8:14994.
- 639 de Boer LE. 1980. Do the chromosomes of the kiwi provide evidence for a monophyletic  
640 origin of the ratites? *Nature* 287:84–85.
- 641 Bolivar P, Mugal CF, Nater A, Ellegren H. 2016. Recombination Rate Variation Modulates  
642 Gene Sequence Evolution Mainly via GC-Biased Gene Conversion, Not Hill-Robertson  
643 Interference, in an Avian System. *Mol. Biol. Evol.* 33:216–227.
- 644 Bull JJ. 1983. Evolution of sex determining mechanisms. Benjamin-Cummings Publishing  
645 Company
- 646 Carvalho AB, Clark AG. 1999. Genetic recombination: Intron size and natural selection.  
647 *Nature* 401:344–344.
- 648 Carvalho AB, Clark AG. 2013. Efficient identification of Y chromosome sequences in the  
649 human and *Drosophila* genomes. *Genome Res.* 23:1894–1907.
- 650 Cavoto E, Neuenschwander S, Goudet J, Perrin N. 2017. Sex-antagonistic genes, XY  
651 recombination and feminized Y chromosomes. *J. Evol. Biol.* 65:123.
- 652 Charlesworth B, Campos JL, Jackson BC. 2018. Faster-X evolution: theory and evidence  
653 from *Drosophila*. *Mol. Ecol.*
- 654 Charlesworth B, Coyne JA, Barton NH. 1987. The relative rates of evolution of sex  
655 chromosomes and autosomes. *Am. Nat.*
- 656 Charlesworth B, Jordan CY, Charlesworth D. 2014. The evolutionary dynamics of sexually  
657 antagonistic mutations in pseudoautosomal regions of sex chromosomes. *Evolution* 68:1339–  
658 1350.
- 659 Charlesworth D. 2017. Evolution of recombination rates between sex chromosomes. *Philos.*  
660 *Trans. R. Soc. Lond. B. Biol. Sci.* 372:20160456.
- 661 Charlesworth D, Charlesworth B, Marais G. 2005. Steps in the evolution of heteromorphic  
662 sex chromosomes. *Heredity* 95:118–128.
- 663 Chen N, Bellott DW, Page DC, Clark AG. 2012. Identification of avian W-linked contigs by  
664 short-read sequencing. *BMC Genomics* 13:183.
- 665 Connallon T. 2007. Adaptive Protein Evolution of X-linked and Autosomal Genes in  
666 *Drosophila*: Implications for Faster-X Hypotheses. *Mol. Biol. Evol.* 24:2566–2572.
- 667 Cortez D, Marin R, Toledo-Flores D, Froidevaux L, Liechi A, Waters PD, Grützner F,  
668 Kaessmann H. 2014. Origins and functional evolution of Y chromosomes across mammals.  
669 *Nature* 508:488–493.
- 670 Dufresnes C, Borzée A, Horn A, Stöck M, Ostini M, Sermier R, Wassef J, Litvinchuck SN,  
671 Kosch TA, Waldman B, et al. 2015. Sex-Chromosome Homomorphy in Palearctic Tree Frogs

- 672 Results from Both Turnovers and X–Y Recombination. *Mol. Biol. Evol.* 32:2328–2337.
- 673 Ellegren H. 2010. Evolutionary stasis: the stable chromosomes of birds. *Trends Ecol. Evol.*
- 674 25:283–291.
- 675 Ellegren H. 2011. Sex-chromosome evolution: recent progress and the influence of male and
- 676 female heterogamety. *Nat. Rev. Genet.* 12:157–166.
- 677 Galtier N, Roux C, Rousselle M, Romiguier J, Figuet E, Glemin S, Bierne N, Duret L. 2018.
- 678 Codon usage bias in animals: disentangling the effects of natural selection, effective
- 679 population size and GC-biased gene conversion. *Mol. Biol. Evol.*
- 680 Gamble T, Castoe TA, Nielsen SV, Banks JL, Card DC, Schield DR, Schuett GW, Booth W.
- 681 2017. The Discovery of XY Sex Chromosomes in a Boa and Python. *Curr. Biol.*:1–11.
- 682 Gorelick R, Fraser D, Mansfield M, Dawson JW, Wijenayake S, Bertram SM. 2016. Abrupt
- 683 shortening of bird W chromosomes in ancestral Neognathae. *Biol. J. Linn. Soc.* 119:488–496.
- 684 Gossmann TI, Santure AW, Sheldon BC, Slate J, Zeng K. 2014. Highly variable
- 685 recombinational landscape modulates efficacy of natural selection in birds. *Genome Biol.*
- 686 *Evol.* 6:2061–2075.
- 687 Graves JAM. 2014. Avian sex, sex chromosomes, and dosage compensation in the age of
- 688 genomics. *Chromosome Res.* 22:45–57.
- 689 Graves JAM. 2015. Evolution of vertebrate sex chromosomes and dosage compensation. *Nat.*
- 690 *Rev. Genet.* 17:33–46.
- 691 Gu L, Walters JR. 2017. Evolution of Sex Chromosome Dosage Compensation in Animals: A
- 692 Beautiful Theory, Undermined by Facts and Bedeviled by Details. *Genome Biol. Evol.*
- 693 9:2461–2476.
- 694 Halldorsson BV, Hardarson MT, Kehr B, Styrkarsdottir U, Gylfason A, Thorleifsson G, Zink
- 695 F, Jonasdottir A, Jonasdottir A, Sulem P, et al. 2016. The rate of meiotic gene conversion
- 696 varies by sex and age. *Nat. Genet.* 48:1377–1384.
- 697 Itoh Y, Replogle K, Kim Y-H, Wade J, Clayton DF, Arnold AP. 2010. Sex bias and dosage
- 698 compensation in the zebra finch versus chicken genomes: general and specialized patterns
- 699 among birds. *Genome Res.* 20:512–518.
- 700 Janes DE, Ezaz T, Marshall Graves JA, Edwards SV. 2009. Recombination and Nucleotide
- 701 Diversity in the Sex Chromosomal Pseudoautosomal Region of the Emu, *Dromaius*
- 702 *novaehollandiae*. *J. Hered.* 100:125–136.
- 703 Jensen-Seaman MI, Furey TS, Payseur BA, Lu Y, Roskin KM, Chen C-F, Thomas MA,
- 704 Haussler D, Jacob HJ. 2004. Comparative recombination rates in the rat, mouse, and human
- 705 genomes. *Genome Res.* 14:528–538.

706 Kawakami T, Smeds L, Backström N, Husby A, Qvarnström A, Mugal CF, Olason P,  
707 Ellegren H. 2014. A high-density linkage map enables a second-generation collared  
708 flycatcher genome assembly and reveals the patterns of avian recombination rate variation  
709 and chromosomal evolution. *Mol. Ecol.* 23:4035–4058.

710 Kousathanas A, Halligan DL, Keightley PD. 2014. Faster-X Adaptive Protein Evolution in  
711 House Mice. *Genetics* 196:1131–1143.

712 Kurtz S, Phillippy A, Delcher AL, Smoot M, Shumway M, Antonescu C, Salzberg SL. 2004.  
713 Versatile and open software for comparing large genomes. *Genome Biol.* 5:R12.

714 Lahn BT, Page DC. 1999. Four Evolutionary Strata on the Human X Chromosome. *Science*  
715 286:964–967.

716 Le Duc D, Renaud G, Krishnan A, Almén MS, Huynen L, Prohaska SJ, Ongyerth M,  
717 Bitarello BD, Schiöth HB, Hofreiter M, et al. 2015. Kiwi genome provides insights into  
718 evolution of a nocturnal lifestyle. *Genome Biol.*:1–15.

719 Li B, Dewey CN. 2011. RSEM: accurate transcript quantification from RNA-Seq data with or  
720 without a reference genome. *BMC Bioinformatics* 12:323.

721 Li H. 2013. Aligning sequence reads, clone sequences and assembly contigs with BWA-  
722 MEM. ArXiv13033997 Q-Bio [Internet]. Available from: <http://arxiv.org/abs/1303.3997>

723 Li H, Handsaker B, Wysoker A, Fennell T, Ruan J, Homer N, Marth G, Abecasis G, Durbin  
724 R. 2009. The Sequence Alignment/Map format and SAMtools. *Bioinformatics* 25:2078–  
725 2079.

726 Lockton S, Ross-Ibarra J, Gaut BS. 2008. Demography and weak selection drive patterns of  
727 transposable element diversity in natural populations of *Arabidopsis lyrata*. *Proc. Natl. Acad.*  
728 *Sci. U. S. A.* 105:13965–13970.

729 Love MI, Huber W, Anders S. 2014. Moderated estimation of fold change and dispersion for  
730 RNA-seq data with DESeq2. *Genome Biol.* 15:550.

731 Lu J, Wu C-I. 2005. Weak selection revealed by the whole-genome comparison of the X  
732 chromosome and autosomes of human and chimpanzee. *Proc. Natl. Acad. Sci.* 102:4063–  
733 4067.

734 Mank JE, Axelsson E, Ellegren H. 2007. Fast-X on the Z: Rapid evolution of sex-linked  
735 genes in birds. *Genome Res.* 17:618–624.

736 Mank JE, Nam K, Ellegren H. 2010. Faster-Z Evolution Is Predominantly Due to Genetic  
737 Drift. *Mol. Biol. Evol.* 27:661–670.

738 Mank JE, Vicoso B, Berlin S, Charlesworth B. 2010. EFFECTIVE POPULATION SIZE  
739 AND THE FASTER-X EFFECT: EMPIRICAL RESULTS AND THEIR

- 740 INTERPRETATION. *Evolution* 64:663–674.
- 741 Marais G, Mouchiroud D, Duret L. 2001. Does recombination improve selection on codon  
742 usage? Lessons from nematode and fly complete genomes. *Proc. Natl. Acad. Sci.* 98:5688–  
743 5692.
- 744 Meisel RP, Connallon T. 2013. The faster-X effect: integrating theory and data. *Trends*  
745 *Genet.* 29:537–544.
- 746 Nishida-Umehara C, Fujiwara A, Ogawa A, Mizuno S, Abe S, Yoshida MC. 1999.  
747 Differentiation of Z and W chromosomes revealed by replication banding and FISH mapping  
748 of sex-chromosome-linked DNA markers in the cassowary (Aves, Ratitae). *Chromosome*  
749 *Res.* 7:635–640.
- 750 van Oers K, Santure AW, De Cauwer I, van Bers NEM, Crooijmans RPMA, Sheldon BC,  
751 Visser ME, Slate J, Groenen MAM. 2014. Replicated high-density genetic maps of two great  
752 tit populations reveal fine-scale genomic departures from sex-equal recombination rates.  
753 *Heredity* 112:307–316.
- 754 Ogawa A, Murata K, Mizuno S. 1998. The location of Z- and W-linked marker genes and  
755 sequence on the homomorphic sex chromosomes of the ostrich and the emu. *Proc. Natl.*  
756 *Acad. Sci.* 95:4415–4418.
- 757 Otto SP. 2014. Selective maintenance of recombination between the sex chromosomes. *J.*  
758 *Evol. Biol.* 27:1431–1442.
- 759 Otto SP, Pannell JR, Peichel CL, Ashman T-L, Charlesworth D, Chippindale AK, Delph LF,  
760 Guerrero RF, Scarpino SV, McAllister BF. 2011. About PAR: The distinct evolutionary  
761 dynamics of the pseudoautosomal region. *Trends Genet.* 27:358–367.
- 762 Perrin N. 2009. Sex reversal: a fountain of youth for sex chromosomes? *Evol. Int. J. Org.*  
763 *Evol.* 63:3043–3049.
- 764 Pigozzi MI. 2011. Diverse stages of sex-chromosome differentiation in tinamid birds:  
765 evidence from crossover analysis in *Eudromia elegans* and *Crypturellus tataupa*. *Genetica*  
766 139:771–777.
- 767 Pigozzi MI, Solari AJ. 1999. The ZW pairs of two paleognath birds from two orders show  
768 transitional stages of sex chromosome differentiation. :1–11.
- 769 del Priore L, Pigozzi MI. 2017. Broad-scale recombination pattern in the primitive bird *Rhea*  
770 *americana* (Ratites, Palaeognathae). *PLoS ONE* 12:e0187549.
- 771 Ramstad KM, Miller HC, Kollé G. 2016. Sixteen kiwi (*Apteryx* spp) transcriptomes provide  
772 a wealth of genetic markers and insight into sex chromosome evolution in birds. *BMC*  
773 *Genomics* 17:410.

774 Rice WR. 1987. THE ACCUMULATION OF SEXUALLY ANTAGONISTIC GENES AS  
775 A SELECTIVE AGENT PROMOTING THE EVOLUTION OF REDUCED  
776 RECOMBINATION BETWEEN PRIMITIVE SEX CHROMOSOMES. *Evolution* 41:911–  
777 914.

778 Rizzon C, Marais G, Gouy M, Biémont C. 2002. Recombination rate and the distribution of  
779 transposable elements in the *Drosophila melanogaster* genome. *Genome Res.* 12:400–407.

780 Rodrigues N, Studer T, Dufresnes C, Perrin N. 2018. Sex-chromosome recombination in  
781 common frogs brings water to the fountain-of-youth. *Mol. Biol. Evol.* 67:1.

782 Romiguier J, Ranwez V, Douzery EJP, Galtier N. 2010. Contrasting GC-content dynamics  
783 across 33 mammalian genomes: relationship with life-history traits and chromosome sizes.  
784 *Genome Res.* 20:1001–1009.

785 Rousselle M, Faivre N, Ballenghien M, Galtier N, Nabholz B. 2016. Hemizyosity Enhances  
786 Purifying Selection: Lack of Fast-Z Evolution in Two Satyrine Butterflies. *Genome Biol.*  
787 *Evol.* 8:3108–3119.

788 Sackton TB, Corbett-Detig RB, Nagaraju J, Vaishna L, Arunkumar KP, Hartl DL. 2014.  
789 Positive selection drives faster-Z evolution in silkmoths. *Evolution* 68:2331–2342.

790 Sackton TB, Grayson P, Cloutier A, Hu Z, Liu JS, Wheeler NE, Gardner PP, Clarke JA,  
791 Baker AJ, Clamp M, et al. 2018. Convergent regulatory evolution and the origin of  
792 flightlessness in palaeognathous birds. *bioRxiv:262584*.

793 Shields DC, Sharp PM, Higgins DG, Wright F. 1988. “Silent” sites in *Drosophila* genes are  
794 not neutral: evidence of selection among synonymous codons. *Mol. Biol. Evol.* 5:704–716.

795 Singhal S, Leffler EM, Sannareddy K, Turner I, Venn O, Hooper DM, Strand AI, Li Q,  
796 Raney B, Balakrishnan CN, et al. 2015. Stable recombination hotspots in birds. *Science*  
797 350:928–932.

798 Smeds L, Kawakami T, Burri R, Bolivar P, Husby A, Qvarnström A, Uebbing S, Ellegren H.  
799 2014. Genomic identification and characterization of the pseudoautosomal region in highly  
800 differentiated avian sex chromosomes. *Nat. Commun.* 5:5448.

801 Stiglec R, Ezaz T, Graves JAM. 2007. A new look at the evolution of avian sex  
802 chromosomes. *Cytogenet. Genome Res.* 117:103–109.

803 Szövényi P, Ullrich KK, Rensing SA, Lang D, van Gessel N, Stenøien HK, Conti E, Reski R.  
804 2017. Selfing in Haploid Plants and Efficacy of Selection: Codon Usage Bias in the Model  
805 Moss *Physcomitrella patens*. *Genome Biol. Evol.* 9:1528–1546.

806 Tomaszewicz M, Medvedev P, Makova KD. 2017. Y and W Chromosome Assemblies:  
807 Approaches and Discoveries. *Trends Genet.*:1–17.

- 808 Torgerson DG. 2003. Sex-Linked Mammalian Sperm Proteins Evolve Faster Than  
809 Autosomal Ones. *Mol. Biol. Evol.* 20:1705–1709.
- 810 Tsuda Y, Nishida-Umehara C, Ishijima J, Yamada K, Matsuda Y. 2007. Comparison of the Z  
811 and W sex chromosomal architectures in elegant crested tinamou (*Eudromia elegans*) and  
812 ostrich (*Struthio camelus*) and the process of sex chromosome differentiation in  
813 palaeognathous birds. *Chromosoma* 116:159–173.
- 814 Uebbing S, Konzer A, Xu L, Backström N, Brunström B, Bergquist J, Ellegren H. 2015.  
815 Quantitative Mass Spectrometry Reveals Partial Translational Regulation for Dosage  
816 Compensation in Chicken. *Mol. Biol. Evol.* 32:2716–2725.
- 817 Uebbing S, Künstner A, Mäkinen H, Ellegren H. 2013. Transcriptome sequencing reveals the  
818 character of incomplete dosage compensation across multiple tissues in flycatchers. *Genome*  
819 *Biol. Evol.* 5:1555–1566.
- 820 Vicoso B, Charlesworth B. 2006. Evolution on the X chromosome: unusual patterns and  
821 processes. *Nat. Rev. Genet.* 7:645–653.
- 822 Vicoso B, Emerson JJ, Zektser Y, Mahajan S, Bachtrog D. 2013. Comparative Sex  
823 Chromosome Genomics in Snakes: Differentiation, Evolutionary Strata, and Lack of Global  
824 Dosage Compensation. *PLoS Biol.* 11:e1001643–15.
- 825 Vicoso B, Kaiser VB, Bachtrog D. 2013. Sex-biased gene expression at homomorphic sex  
826 chromosomes in emus and its implication for sex chromosome evolution. *Proc. Natl. Acad.*  
827 *Sci.* 110:6453–6458.
- 828 Wang Z, Zhang J, Yang W, An N, Zhang P, Zhang G, Zhou Q. 2014. Temporal genomic  
829 evolution of bird sex chromosomes. :1–12.
- 830 Wright AE, Dean R, Zimmer F, Mank JE. 2016. How to make a sex chromosome. *Nat.*  
831 *Commun.* 7:1–8.
- 832 Wright AE, Harrison PW, Zimmer F, Montgomery SH, Pointer MA, Mank JE. 2015.  
833 Variation in promiscuity and sexual selection drives avian rate of Faster-Z evolution. *Mol.*  
834 *Ecol.* 24:1218–1235.
- 835 Yang Z. 2007. PAML 4: Phylogenetic Analysis by Maximum Likelihood. *Mol. Biol. Evol.*  
836 24:1586–1591.
- 837 Yazdi HP, Ellegren H. 2014. Old but not (so) degenerated—slow evolution of largely  
838 homomorphic sex chromosomes in ratites. *Mol. Biol. Evol.* 31:1444–1453.
- 839 Zhang G, Li C, Li Q, Li B, Larkin DM, Lee C, Storz JF, Antunes A, Greenwold MJ,  
840 Meredith RW, et al. 2014. Comparative genomics reveals insights into avian genome  
841 evolution and adaptation. *Science* 346:1311–1320.

- 842 Zhang J, Li C, Zhou Q, Zhang G. 2015. Improving the ostrich genome assembly using optical  
843 mapping data. *GigaScience* 4:298–3.
- 844 Zhang Q, Edwards SV. 2012. The Evolution of Intron Size in Amniotes: A Role for Powered  
845 Flight? *Genome Biol. Evol.* 4:1033–1043.
- 846 Zhou Q, Zhang J, Bachtrog D, An N, Huang Q, Jarvis ED, Gilbert MTP, Zhang G. 2014.  
847 Complex evolutionary trajectories of sex chromosomes across bird taxa. *Science*  
848 346:1246338.
- 849
